# Supplementary material
Source: PubMed Central journal article supplement (PMC1939894)
Supplement: blood_blood-2006-12-061689_1.pdf [file blood_blood-2006-12-061689_1.pdf]

|           | <b>INST_NAME</b>               | <b>CITY</b>        | <b>STATE</b> | <b>COUNTRY</b> |
|-----------|--------------------------------|--------------------|--------------|----------------|
| <b>1</b>  | U of Arkansas                  | Little Rock        | AR           | US             |
| <b>2</b>  | Baylor College of Medicine     | Houston            | TX           | US             |
| <b>3</b>  | Children's Atlanta, Emory Univ | Atlanta            | GA           | US             |
| <b>4</b>  | UT/Galveston                   | Galveston          | TX           | US             |
| <b>5</b>  | WV Univ, Charleston            | Charleston         | WV           | US             |
| <b>6</b>  | Brody School of Med at ECU     | Greenville         | NC           | US             |
| <b>7</b>  | Tripler Army Med Ctr           | Tripler AMC        | HI           | US             |
| <b>8</b>  | Child Hosp Greenville System   | Greenville         | SC           | US             |
| <b>9</b>  | Oklahoma University            | Oklahoma City      | OK           | US             |
| <b>10</b> | Midwest Children's Cancer Ctr  | Milwaukee          | WI           | US             |
| <b>11</b> | UT Southwestern Medical Center | Dallas             | TX           | US             |
| <b>12</b> | Stanford University Med Ctr    | Palo Alto          | CA           | US             |
| <b>13</b> | Carolinas Med Ctr              | Charlotte          | NC           | US             |
| <b>14</b> | Yale University                | New Haven          | CT           | US             |
| <b>15</b> | U of Miami                     | Miami              | FL           | US             |
| <b>16</b> | Nemours/Orlando                | Orlando            | FL           | US             |
| <b>17</b> | All Children's Hosp            | St. Petersburg     | FL           | US             |
| <b>18</b> | Sacred Heart Hosp              | Pensacola          | FL           | US             |
| <b>19</b> | Inova Fairfax Hospital         | Fairfax            | VA           | US             |
| <b>20</b> | Cook Children's Medical Center | Fort Worth         | TX           | US             |
| <b>21</b> | Via Christi Regional Med Ctr   | Wichita            | KS           | US             |
| <b>22</b> | Stollery Children's Hospital   | Edmonton           | AB           | CA             |
| <b>23</b> | St. Christopher's Hosp         | Philadelphia       | PA           | US             |
| <b>24</b> | Children's Hospital San Diego  | San Diego          | CA           | US             |
| <b>25</b> | St. Vincent Hosp - Wisconsin   | Green Bay          | WI           | US             |
| <b>26</b> | U of Arizona                   | Tucson             | AZ           | US             |
| <b>27</b> | Child Hosp New Orleans/LSU CCO | New Orleans        | LA           | US             |
| <b>28</b> | Hackensack Med Ctr             | Hackensack         | NJ           | US             |
| <b>29</b> | Wesley Med Ctr                 | Wichita            | KS           | US             |
| <b>30</b> | Miami Children's Hosp          | Miami              | FL           | US             |
| <b>31</b> | U of Maryland                  | Baltimore          | MD           | US             |
| <b>32</b> | Boston Floating Hosp           | Boston             | MA           | US             |
| <b>33</b> | Hurley Medical Ctr             | Flint              | MI           | US             |
| <b>34</b> | Child Mem Hosp (Chicago)       | Chicago            | IL           | US             |
| <b>35</b> | Advocate Hope Children's Hosp  | Oak Lawn           | IL           | US             |
| <b>36</b> | Nemours/Jacksonville           | Jacksonville       | FL           | US             |
| <b>37</b> | Rush-Presbyterian              | Chicago            | IL           | US             |
| <b>38</b> | St John Hosp                   | Grosse Point Woods | MI           | US             |
| <b>39</b> | U of Mass                      | Worcester          | MA           | US             |

|    | <b>INST_NAME</b>               | <b>CITY</b>     | <b>STATE</b> | <b>COUNTRY</b> |
|----|--------------------------------|-----------------|--------------|----------------|
| 40 | UC/Davis                       | Sacramento      | CA           | US             |
| 41 | UT/San Antonio                 | San Antonio     | TX           | US             |
| 42 | Alberta Children's Hosp        | Calgary         | AB           | CA             |
| 43 | Scott & White Memorial Hosp    | Temple          | TX           | US             |
| 44 | Child East Ontario             | Ottawa          | ON           | CA             |
| 45 | Tampa Children's Hospital      | Tampa           | FL           | US             |
| 46 | Joe DiMaggio Children's        | Hollywood       | FL           | US             |
| 47 | St. Jude Midwest               | Peoria          | IL           | US             |
| 48 | East Tenn State Univ           | Johnson City    | TN           | US             |
| 49 | Warren Clinic                  | Tulsa           | OK           | US             |
| 50 | SUNY Stony Brook               | Stony Brook     | NY           | US             |
| 51 | Madigan Army Med Ctr           | Tacoma          | WA           | US             |
| 52 | Hosp Sick Children             | Toronto         | ON           | CA             |
| 53 | Eastern Maine Medical Center   | Bangor          | ME           | US             |
| 54 | Schneider Children's Hospital  | New Hyde Park   | NY           | US             |
| 55 | Emanuel Hospital               | Portland        | OR           | US             |
| 56 | St. Mary's Hosp                | West Palm Beach | FL           | US             |
| 57 | Presbyterian Hosp.             | Charlotte       | NC           | US             |
| 58 | Florida Hospital Cancer Inst.  | Orlando         | FL           | US             |
| 59 | Naval Medical Ctr, Portsmouth  | Portsmouth      | VA           | US             |
| 60 | Sutter Medical Center, Sacrame | Sacramento      | CA           | US             |
| 61 | Roanoke Valley                 | Roanoke         | VA           | US             |
| 62 | Mission Hospitals              | Asheville       | NC           | US             |
| 63 | Medical City Children's Hosp   | Dallas          | TX           | US             |
| 64 | Baptist Children's Hospital    | Miami           | FL           | US             |
| 65 | Tulane Univ Med Ctr            | New Orleans     | LA           | US             |
| 66 | Kaiser Foundation Research Ins | Sacramento      | CA           | US             |
| 67 | U of Virginia                  | Charlottesville | VA           | US             |
| 68 | Cabell Huntington Hospital     | Huntington      | WV           | US             |
| 69 | Washington Univ                | St. Louis       | MO           | US             |
| 70 | U of New Mexico                | Albuquerque     | NM           | US             |
| 71 | U of Miss Med Ctr              | Jackson         | MS           | US             |
| 72 | Duke University                | Durham          | NC           | US             |
| 73 | M. U. S. Carolina              | Charleston      | SC           | US             |
| 74 | U of Kansas                    | Kansas City     | KS           | US             |
| 75 | U of Florida                   | Gainesville     | FL           | US             |
| 76 | Cancer Researh Ctr of Hawaii   | Honolulu        | HI           | US             |
| 77 | U of Alabama at Birmingham     | Birmingham      | AL           | US             |
| 78 | Child Hosp Michigan            | Detroit         | MI           | US             |
| 79 | SPOG Bern                      | Bern            | ZZ           | CH             |
| 80 | SPOG Geneva                    | Geneva          | ZZ           | CH             |
| 81 | SPOG Lausanne                  | Lausanne        | ZZ           | CH             |

|           | <b>INST_NAME</b>               | <b>CITY</b>    | <b>STATE</b> | <b>COUNTRY</b> |
|-----------|--------------------------------|----------------|--------------|----------------|
| <b>82</b> | McGill Univ Health Ctr         | Montreal       | QC           | CA             |
| <b>83</b> | Rhode Island Hosp              | Providence     | RI           | US             |
| <b>84</b> | Univ. of Missouri - Columbia   | Columbia       | MO           | US             |
| <b>85</b> | WVU/Morgantown                 | Morgantown     | WV           | US             |
| <b>86</b> | Wake Forest Univ. School Med   | Winston-Salem  | NC           | US             |
| <b>87</b> | Walter Reed Army Med           | Washington     | DC           | US             |
| <b>88</b> | Massachusetts Gen Hosp         | Boston         | MA           | US             |
| <b>89</b> | Commonwealth Univ - MCV        | Richmond       | VA           | US             |
| <b>90</b> | Johns Hopkins Univ             | Baltimore      | MD           | US             |
| <b>91</b> | Roswell Park Cancer Institute  | Buffalo        | NY           | US             |
| <b>92</b> | SUNY Upstate Medical Univ      | Syracuse       | NY           | US             |
| <b>93</b> | Dartmouth Hitchcock Med Ctr    | Lebanon        | NH           | US             |
| <b>94</b> | U of Vermont                   | Burlington     | VT           | US             |
| <b>95</b> | Cardinal Glennon Childrens Med | St. Louis      | MO           | US             |
| <b>96</b> | Driscoll Children's Hosp       | Corpus Christi | TX           | US             |
